# Supplementary material for: Randomized trial of tofacitinib in active ulcerative colitis: analysis of efficacy based on patient-reported outcomes
Source: PubMed Central journal article supplement (PMC4323227; doi:10.1186/s12876-015-0239-9), 2015-02-05
Supplement: 12876_2015_239_MOESM3_ESM.pdf [file 12876_2015_239_MOESM3_ESM.pdf]

#### A4 LIST OF INVESTIGATORS AND CORRESPONDING ETHICS COMMITTEES OR INSTITUTIONAL REVIEW BOARDS

##### Belgium

##### Coordinating Investigators:

<None Entered>

| <u>Center</u> | <u>Principal Investigator</u>    | <u>Co-Investigator(s)</u> | <u>Sub-Investigator(s)</u>                                            | <u>Address(es)</u>                                                                                                         | <u>Institutional Review Board or Ethics Committee Address(es)</u>                                                                                                |
|---------------|----------------------------------|---------------------------|-----------------------------------------------------------------------|----------------------------------------------------------------------------------------------------------------------------|------------------------------------------------------------------------------------------------------------------------------------------------------------------|
| 1029          | Dr. Harald Peeters               |                           | Dr. Danny De Looze<br>Prof. Martine De Vos                            | Universitair Ziekenhuis Gent<br>Maag-, darm- en leverziekten<br>De Pintelaan 185<br>Gent, 9000<br>BELGIUM                  | Universitaire Ziekenhuizen Leuven -<br>Campus Gasthuisberg<br>Commissie voor Medische Ethiek /<br>Klinisch Onderzoek<br>Herestraat 49<br>Leuven, 3000<br>BELGIUM |
| 1030          | Prof. Severine A. R. A. Vermeire |                           | Dr. Maja Noman<br>Prof. Paul J. Rutgeerts<br>Prof. Gert A. Van Assche | Universitaire Ziekenhuizen<br>Leuven - Campus Gasthuisberg<br>Gastroenterology<br>Herestraat 49<br>Leuven, 3000<br>BELGIUM | Universitaire Ziekenhuizen Leuven -<br>Campus Gasthuisberg<br>Commissie voor Medische Ethiek /<br>Klinisch Onderzoek<br>Herestraat 49<br>Leuven, 3000<br>BELGIUM |
| 1031          | Dr. Joannes Holvoet              |                           | Dr. Joris Dutre<br>Dr. Pierre L.A. Gigase<br>Dr. Isabelle Ruytjens    | Ziekenhuisnetwerk Antwerpen<br>Middelheim<br>Gastro-enterology<br>Lindendreef 1<br>Antwerpen, 2020<br>BELGIUM              | Universitaire Ziekenhuizen Leuven -<br>Campus Gasthuisberg<br>Commissie voor Medische Ethiek /<br>Klinisch Onderzoek<br>Herestraat 49<br>Leuven, 3000<br>BELGIUM |

**Brazil****Coordinating Investigators:**

&lt;None Entered&gt;

| <u>Center</u> | <u>Principal Investigator</u> | <u>Co-Investigator(s)</u> | <u>Sub-Investigator(s)</u>                                                                                              | <u>Address(es)</u>                                                                                                                                                            | <u>Institutional Review Board or Ethics Committee Address(es)</u>                                                                                                                                                              |
|---------------|-------------------------------|---------------------------|-------------------------------------------------------------------------------------------------------------------------|-------------------------------------------------------------------------------------------------------------------------------------------------------------------------------|--------------------------------------------------------------------------------------------------------------------------------------------------------------------------------------------------------------------------------|
| 1063          | Dr. Luiz Carlos Marquetti     |                           | Dr. Fatima Regina Marques Abreu<br>Dr. Freddy Goldberg Eliaschewitz<br>Dr. Carlos Valter Sobrado Jr                     | CPCLIN - Centro de Pesquisas Clinicas Ltda<br>Rua Goias, 193<br>Higienopolis<br>Sao Paulo, SP 01244-030<br>BRAZIL                                                             | Irmandade da Santa Casa de Misericordia de Sao Paulo -ISCMSP<br>Rua Santa Isabel,305<br>4 andar -Santa Cecilia<br>Sao Paulo, SP 01221-010<br>BRAZIL                                                                            |
| 1064          | Dr. Marta Brenner Machado     |                           | Dra Luciana Schuck Guedes                                                                                               | Hospital São Lucas da PUCRS<br>Av. Ipiranga, 6690 4 andar<br>Jardim Botanico<br>Porto Alegre, RS 90610-000<br>BRAZIL                                                          | Comitê de Ética em Pesquisa da Pontificia Universidade Católica do Rio Grande do Sul - PUCRS<br>Hospital São Lucas da PUCRS<br>Avenida Ipiranga, 6690 ç sala 228/02<br>Jardim Botanico<br>Porto Alegre, RS 90610-000<br>BRAZIL |
| 1074          | Dr Flavio Steinwurz           |                           | Dr Ricardo L Ganc<br>Dr Karime Lucas<br>Dra Maria Luiza Queiroz Miranda<br>Dr Fernanda Eliza Simoes<br>Dr Andrea Vieira | Hospital Israelita Albert Einstein<br>Centro de Pesquisa Clínica - IIEP<br>Av. Albert Einstein<br>2 Subsolo ç Bloco A- Morumbi - 627/701<br>São Paulo, SP 05651-901<br>BRAZIL | Comite de Etica em Pesquisa do Hospital Israelita Albert Einstein<br>Avenida Albert Einstein, 627 / 701 - Bloco A - 2o Subsolo<br>Morumbi<br>São Paulo, São Paulo 05651-901<br>BRAZIL                                          |

090177e181c13ab2\Approved\Approved On: 07-Feb-2011 15:21

## Chile

## Coordinating Investigators:

&lt;None Entered&gt;

| <u>Center</u> | <u>Principal Investigator</u> | <u>Co-Investigator(s)</u> | <u>Sub-Investigator(s)</u>                                | <u>Address(es)</u>                                                                                                                                                   | <u>Institutional Review Board or Ethics Committee Address(es)</u>                                                                                                                                                                                                                        |
|---------------|-------------------------------|---------------------------|-----------------------------------------------------------|----------------------------------------------------------------------------------------------------------------------------------------------------------------------|------------------------------------------------------------------------------------------------------------------------------------------------------------------------------------------------------------------------------------------------------------------------------------------|
| 1081 *        | Sergio de la Barra            |                           | Roberto Nazal                                             | Complejo Hospitalario San Jose<br>Unidad de Gastroenterologia-<br>Endoscopia<br>Profesor Alberto Zanartu 1085<br>Independencia, Santiago 8380418<br>CHILE            | Comite de Etica de Investigacion<br>Servicio de Salud Metropolitano<br>Norte<br>Calle San Jose # 1053<br>Independencia, RM<br>CHILE                                                                                                                                                      |
| 1083          | Carlos Bustos                 |                           | Roberto Leon Sade                                         | Hospital Dr. Gustavo Fricke<br>Alvarez 1532<br>Vina del Mar, 2570017<br>CHILE                                                                                        | Comite Etico Cientifico del Servicio<br>de Salud Vina-Quillota<br>Calle Limache 1307<br>Esquina Penablanca, Piso 2<br>Vina del Mar, V Region<br>CHILE                                                                                                                                    |
| 1085          | Maria Ester Bufadel           |                           | Carolina Figueroa<br>Carolina Pizarro<br>Jorge Valenzuela | Hospital Clinico Universidad de<br>Chile<br>Servicio Gastroenterologia, 3er<br>Piso, Sector D<br>Santos Dumont 999<br>Independencia, Santiago RM<br>8380456<br>CHILE | Comite de Etica de Investigacion<br>Servicio de Salud Metropolitano<br>Norte<br>Calle San Jose # 1053<br>Independencia, RM<br>CHILE<br><br>Comite de Etica, Hospital Clinico<br>Universidad de Chile<br>Santos Dumont 999, 6to Piso,<br>Sector E<br>Independencia, Santiago, RM<br>CHILE |

\* Did not randomize subjects

## Czech Republic

## Coordinating Investigators:

&lt;None Entered&gt;

| <u>Center</u> | <u>Principal Investigator</u> | <u>Co-Investigator(s)</u> | <u>Sub-Investigator(s)</u>                 | <u>Address(es)</u>                                                                                                                                                                                               | <u>Institutional Review Board or Ethics Committee Address(es)</u>                                                                                                                                                                               |
|---------------|-------------------------------|---------------------------|--------------------------------------------|------------------------------------------------------------------------------------------------------------------------------------------------------------------------------------------------------------------|-------------------------------------------------------------------------------------------------------------------------------------------------------------------------------------------------------------------------------------------------|
| 1027          | Dr. Jiri Stehlik              |                           | Dr. Jiri Lastuvka<br>Dr. Michal Tichy      | Masarykova nemocnice<br>Gastroenterologie<br>Socialni pece 3316/12A<br>Usti n. Labem, 401 13<br>CZECH REPUBLIC<br><br>Masarykova nemocnice<br>Socialni pece 3316/12A<br>Usti nad Labem, 401 13<br>CZECH REPUBLIC | Eticka Komise FN Hradec Kralove<br>Hradecka ulice 1172<br>Hradec Kralove, 500 03<br>CZECH REPUBLIC<br><br>Eticka komise Masarykova<br>nemocnice<br>Prispevkova organizace<br>Socialni pece 3316/12A<br>Usti nad Labem, 401 13<br>CZECH REPUBLIC |
| 1071          | Dr. Michal Konecny            |                           |                                            | Fakultni nemocnice Olomouc<br>I. P. Pavlova 6<br>Olomouc, 775 20<br>CZECH REPUBLIC                                                                                                                               | Eticka Komise FN Hradec Kralove<br>Hradecka ulice 1172<br>Hradec Kralove 3, 500 03<br>CZECH REPUBLIC<br><br>Multicenticka eticka komise Fakultni<br>nemocnice Olomouc<br>I.P.Pavlova 6<br>Olomouc, 77520<br>CZECH REPUBLIC                      |
| 1084          | Dr. Tomas Vanasek             |                           | Dr. Pavla Loudova<br>Dr. Miroslava Volfova | Hepato-Gastroenterologie HK,<br>s.r.o.<br>Poliklinika III<br>Trida Edvarda Benese 1549<br>Hradec Kralove, 50012<br>CZECH REPUBLIC                                                                                | Eticka Komise FN Hradec Kralove<br>Hradecka ulice 1172<br>Hradec Kralove, 500 03<br>CZECH REPUBLIC                                                                                                                                              |

## Denmark

## Coordinating Investigators:

&lt;None Entered&gt;

| <u>Center</u> | <u>Principal Investigator</u> | <u>Co-Investigator(s)</u> | <u>Sub-Investigator(s)</u>                                                | <u>Address(es)</u>                                                                                                                                           | <u>Institutional Review Board or Ethics Committee Address(es)</u>                                                                       |
|---------------|-------------------------------|---------------------------|---------------------------------------------------------------------------|--------------------------------------------------------------------------------------------------------------------------------------------------------------|-----------------------------------------------------------------------------------------------------------------------------------------|
| 1023          | Dr. Jens Frederik Dahlerup    |                           | Dr. Joergen Steen Agnholt<br>Dr. Lisbet Ambrosius Christensen             | Aarhus Universitetshospital,<br>Aarhus Sygehus<br>Medicinsk Hepato-gastroenterologisk Afdeling V<br>Noerrebrogade 44, Bygning 7<br>Aarhus C, 8000<br>DENMARK | De Videnskabetiske Komitéer for Region Midtjylland<br>Sundhedssekretariatet<br>P.O. Box 21<br>Skottenborg 26<br>Viborg, 8800<br>DENMARK |
| 1024          | Dr. med. Jan Fallingborg      |                           | Dr. Bent A. Jacobsen<br>Dr. Lone Larsen<br>Dr. Henrik Hoejgaard Rasmussen | Aalborg Sygehus<br>Medicinsk Gastroenterologisk afdeling - Medicinerhuset<br>Moelleparkvej 4, postboks 561<br>Aalborg, 9100<br>DENMARK                       | De Videnskabetiske Komitéer for Region Midtjylland<br>Sundhedssekretariatet<br>P.O. Box 21<br>Skottenborg 26<br>Viborg, 8800<br>DENMARK |

090177e181c13ab2\Approved\Approved On: 07-Feb-2011 15:21

## France

## Coordinating Investigators:

&lt;None Entered&gt;

| <u>Center</u> | <u>Principal Investigator</u> | <u>Co-Investigator(s)</u> | <u>Sub-Investigator(s)</u>                                                                                                                             | <u>Address(es)</u>                                                                                                                   | <u>Institutional Review Board or Ethics Committee Address(es)</u>                                                                                                                                       |
|---------------|-------------------------------|---------------------------|--------------------------------------------------------------------------------------------------------------------------------------------------------|--------------------------------------------------------------------------------------------------------------------------------------|---------------------------------------------------------------------------------------------------------------------------------------------------------------------------------------------------------|
| 1057          | Prof. Jean Frederic Colombel  |                           | Dr. Julien Branche<br>Dr. Antoine Cortot<br>Prof. Pierre Desreumaux<br>Peggy Fournier<br>Dr. Elsa Jozefowicz<br>Gwenola Vernier<br>Dr. Faustine Wartel | Hopital Huriez, CHRU de Lille<br>Service d'Hepato gastro-<br>enterologie<br>1 place de Verdun<br>Lille Cedex, FRANCE 59037<br>FRANCE | Comité de protection des personnes<br><Nord Ouest IV><br>CPP Nord Ouest IV<br>Service de Pharmacologie<br>Faculté de Médecine - Pôle<br>Recherche<br>1, Place de Verdun<br>LILLE cedex, 59045<br>FRANCE |
| 1059          | Pr. Jean-Charles Grimaud      |                           | Dr. Ariadne Desjeux<br>Dr. Catherine Lesavre<br>Dr. Annick Pelletier                                                                                   | Hôpital Nord<br>Service d'Hépatogastro-<br>Enterologie<br>Chemin Bourrely<br>Marseille cedex 20, 13915<br>FRANCE                     | Comité de protection des personnes<br><Nord Ouest IV><br>CPP Nord Ouest IV<br>Service de Pharmacologie<br>Faculté de Médecine - Pôle<br>Recherche<br>1, Place de Verdun<br>LILLE cedex, 59045<br>FRANCE |
| 1061          | Pr. Frank Zerbib              |                           | Dr. Pauline Roumeguere                                                                                                                                 | Hopital Saint-Andre<br>Service d'Hepatogastroenterologie<br>Bordeaux cedex, 33075<br>FRANCE                                          | Comité de protection des personnes<br><Nord Ouest IV><br>CPP Nord Ouest IV<br>Service de Pharmacologie<br>Faculté de Médecine - Pôle<br>Recherche<br>1, Place de Verdun<br>LILLE cedex, 59045<br>FRANCE |

| <u>Center</u> | <u>Principal Investigator</u>                                      | <u>Co-Investigator(s)</u> | <u>Sub-Investigator(s)</u> | <u>Address(es)</u>                                                                                                | <u>Institutional Review Board or Ethics Committee Address(es)</u>                                                                                                                                       |
|---------------|--------------------------------------------------------------------|---------------------------|----------------------------|-------------------------------------------------------------------------------------------------------------------|---------------------------------------------------------------------------------------------------------------------------------------------------------------------------------------------------------|
| 1068          | Dr. Arnaud Bourreille<br>Prof. Jean-paul Galmiche<br>(Previous PI) |                           | Dr. Mathurin Flamand       | CHU Hôtel-Dieu<br>Service Hepato-gastroentérologie<br>1 Place Alexis Ricordeau<br>Nantes CEDEX 1, 44093<br>FRANCE | Comité de protection des personnes<br><Nord Ouest IV><br>CPP Nord Ouest IV<br>Service de Pharmacologie<br>Faculté de Médecine - Pôle<br>Recherche<br>1, Place de Verdun<br>LILLE cedex, 59045<br>FRANCE |

090177e181c13ab2\Approved\Approved On: 07-Feb-2011 15:21

**Hungary****Coordinating Investigators:**

&lt;None Entered&gt;

| <u>Center</u> | <u>Principal Investigator</u> | <u>Co-Investigator(s)</u> | <u>Sub-Investigator(s)</u>                                                     | <u>Address(es)</u>                                                                                                                                           | <u>Institutional Review Board or Ethics Committee Address(es)</u>                                                               |
|---------------|-------------------------------|---------------------------|--------------------------------------------------------------------------------|--------------------------------------------------------------------------------------------------------------------------------------------------------------|---------------------------------------------------------------------------------------------------------------------------------|
| 1032          | Dr. Marta Varga               |                           | Dr. Klara Csefko<br>Dr. Ildiko Soos<br>Dr. Ildiko Soos<br>Dr. Mariann Szabo    | Dr. Rethy Pal Korhaz es<br>Rendelointezet/III. sz.<br>Belgyogyaszati Osztaly<br>Gyulai ut 18.<br>Bekescsaba, 5600<br>HUNGARY                                 | Egeszseguyi Tudomanyos Tanacs<br>Klinikai Farmakologiai Etikai<br>Bizottsaga<br>Arany J. u. 6-8.<br>Budapest, H-1051<br>HUNGARY |
| 1033          | Prof. Margit Zeher            |                           | Dr. Zsolt Barta<br>Dr. Eva Zold                                                | Debreceni Egyetem Orvos- es<br>Egeszsegutudo-manyi Centrum/III.<br>sz. Belgyogyaszati Klinika<br>Moricz Zsigmond krt. 22.<br>Debrecen, 4004<br>HUNGARY       | Egeszseguyi Tudomanyos Tanacs<br>Klinikai Farmakologiai Etikai<br>Bizottsaga<br>Arany J. u. 6-8.<br>Budapest, H-1051<br>HUNGARY |
| 1034          | Dr Janos Novak                |                           | Dr. Ilona Fazekas<br>Dr. Zoltan Gurzo<br>Dr. Sandor Ilyes<br>Dr. Laszlo Szalai | Bekes Megyei Kepviselo-testulet<br>Pandy Kalman Korhaza<br>Simmelweis u. 1.<br>Gyula, 5701<br>HUNGARY                                                        | Egeszseguyi Tudomanyos Tanacs<br>Klinikai Farmakologiai Etikai<br>Bizottsaga<br>Arany J. u. 6-8.<br>Budapest, H-1051<br>HUNGARY |
| 1035          | Prof. Laszlo Ujszaszy         |                           | Dr. Gabor Horvath<br>Dr. Janos Theisz                                          | Miskolc Megyei Jogu Varos<br>onkormanyzata Semmelweis<br>Korhaz-Rendelointezet es<br>Egyetemi Oktato Korhaz<br>Csabai kapu 9-11.<br>Miskolc, 3529<br>HUNGARY | Egeszseguyi Tudomanyos Tanacs<br>Klinikai Farmakologiai Etikai<br>Bizottsaga<br>Arany J. u. 6-8.<br>Budapest, H-1051<br>HUNGARY |



| <u>Center</u> | <u>Principal Investigator</u> | <u>Co-Investigator(s)</u> | <u>Sub-Investigator(s)</u>                                                                                            | <u>Address(es)</u>                                                                                                                          | <u>Institutional Review Board or Ethics Committee Address(es)</u>                                                               |
|---------------|-------------------------------|---------------------------|-----------------------------------------------------------------------------------------------------------------------|---------------------------------------------------------------------------------------------------------------------------------------------|---------------------------------------------------------------------------------------------------------------------------------|
| 1036          | Prof. Bela Hunyady            |                           | Dr. Andras Deak<br>Dr. Eva Graffits<br>Dr. Attila Haragh<br>Dr. Zoltan Kovacs<br>Dr. Klara Kubinyi<br>Dr. Csaba Sulle | Kaposi Mor Oktato Korhaz /<br>Belgyogyaszati osztaly<br>Tallian Gy. u. 20-32.<br>Kaposvar, 7400<br>HUNGARY                                  | Egeszseguyi Tudomanyos Tanacs<br>Klinikai Farmakologiai Etikai<br>Bizottsaga<br>Arany J. u. 6-8.<br>Budapest, H-1051<br>HUNGARY |
| 1037          | Dr. Tamas Molnar              |                           | Dr. Klaudia Farkas<br>Dr. Ferenc Nagy<br>Dr. Zoltan Szepes<br>Dr. Tibor Wittmann                                      | Szegedi Tudomanyegyetem<br>altalanos Orvostudomanyi Kar / I.<br>sz. Belgyogyaszati Klinika<br>Tisza L. korut 107<br>Szeged, 6720<br>HUNGARY | Egeszseguyi Tudomanyos Tanacs<br>Klinikai Farmakologiai Etikai<br>Bizottsaga<br>Arany J. u. 6-8.<br>Budapest, H-1051<br>HUNGARY |
| 1038          | Dr. Agnes Salamon             |                           | Dr. Ferenc Felfoldi<br>Dr. Iren Matai<br>Dr. Judit Santa<br>Dr. Beatrix Tam<br>Dr. Gyula Toth<br>Dr. Edit Vadasz      | Clinfan Kft.<br>Beri Balogh Adam u. 5-7.<br>Szekszard, 7100<br>HUNGARY                                                                      | Egeszseguyi Tudomanyos Tanacs<br>Klinikai Farmakologiai Etikai<br>Bizottsaga<br>Arany J. u. 6-8.<br>Budapest, H-1051<br>HUNGARY |
| 1039          | Prof. Istvan Racz             |                           | Dr. Mihaly Csondes<br>Dr. Saleh Hussam<br>Dr. Tibor Karasz<br>Dr. Andrea Szabo                                        | Petz Aladar Megyei Oktato<br>Korhaz / I Belgyogyaszat<br>Vasvari Pal u. 2-4.<br>Gyor, 9023<br>HUNGARY                                       | Egeszseguyi Tudomanyos Tanacs<br>Klinikai Farmakologiai Etikai<br>Bizottsaga<br>Arany J. u. 6-8.<br>Budapest, H-1051<br>HUNGARY |
| 1052          | Dr. Gyula Pecs                |                           | Dr. Zsuzsanna Fuzi<br>Dr. Tibor Szabo<br>Dr. Lajos Toth                                                               | Karolina Korhaz Rendelointezet,<br>Belgyogyaszat<br>Regi Vamhaz ter 2-4.<br>Mosonmagyarovar, 9200<br>HUNGARY                                | Egeszseguyi Tudomanyos Tanacs<br>Klinikai Farmakologiai Etikai<br>Bizottsaga<br>Arany J. u. 6-8.<br>Budapest, H-1051<br>HUNGARY |

| <u>Center</u> | <u>Principal Investigator</u> | <u>Co-Investigator(s)</u> | <u>Sub-Investigator(s)</u>                                                         | <u>Address(es)</u>                                                                                                                                        | <u>Institutional Review Board or Ethics Committee Address(es)</u>                                                                |
|---------------|-------------------------------|---------------------------|------------------------------------------------------------------------------------|-----------------------------------------------------------------------------------------------------------------------------------------------------------|----------------------------------------------------------------------------------------------------------------------------------|
| 1053          | Dr. Gyorgy Szekely            |                           | Dr. Bela Boka<br>Dr. Gabor Sipos<br>Dr. Gabor Tamas Toth                           | Fovarosi Onkormanyzat Szent<br>Janos Korhaz es Rendelointezet,<br>I. Belgyogyaszat es<br>Gastroenterologia<br>Dios arok 1-3.<br>Budapest, 1125<br>HUNGARY | Egeszsegugyi Tudomanyos Tanacs<br>Klinikai Farmakologiai Etikai<br>Bizottsaga<br>Arany J. u. 6-8.<br>Budapest, H-1051<br>HUNGARY |
| 1054          | Dr. Robert Schnabel           |                           | Dr. Sandor Molnar<br>Dr. Valeria Sipos<br>Dr. Mariann Vadnai<br>Dr. Patricia Varga | Fovarosi Onkormanyzat Nyiro<br>Gyula Korhaz, 2. sz.<br>Belgyogyaszati Osztaly<br>Lehel u. 59.<br>Budapest, 1135<br>HUNGARY                                | Egeszsegugyi Tudomanyos Tanacs<br>Klinikai Farmakologiai Etikai<br>Bizottsaga<br>Arany J. u. 6-8.<br>Budapest, H-1051<br>HUNGARY |
| 1055          | Dr. Barnabas Bod              |                           | Dr. Aranka Kovacs                                                                  | Dr. Bugyi Istvan Korhaz,<br>Gasztroenterologia<br>Sima F. u. 44-58.<br>Szentcsanak, 6600<br>HUNGARY                                                       | Egeszsegugyi Tudomanyos Tanacs<br>Klinikai Farmakologiai Etikai<br>Bizottsaga<br>Arany J. u. 6-8.<br>Budapest, H-1051<br>HUNGARY |

090177e181c13ab2\Approved\Approved On: 07-Feb-2011 15:21

**Israel****Coordinating Investigators:**

&lt;None Entered&gt;

| <u>Center</u> | <u>Principal Investigator</u> | <u>Co-Investigator(s)</u> | <u>Sub-Investigator(s)</u>                                                                                                                                                                                | <u>Address(es)</u>                                                                                                          | <u>Institutional Review Board or Ethics Committee Address(es)</u>                                                               |
|---------------|-------------------------------|---------------------------|-----------------------------------------------------------------------------------------------------------------------------------------------------------------------------------------------------------|-----------------------------------------------------------------------------------------------------------------------------|---------------------------------------------------------------------------------------------------------------------------------|
| 1073          | Prof. Yaron Niv               |                           | Dr. Zaza Beniashvili<br>Dr. Ram Menashe Dickman<br>Dr. Gerald Martin Fraser<br>Dr. Moshe Furman<br>Dr. Eyal Gal<br>Dr. Zohar Levy<br>Dr. Lev Lichtenstein<br>Dr. Boris Sapoznikov<br>Dr. Alexander Vilkin | Rabin Medical Centre Beilinson Campus, Gastroenterology Department<br>Petah-tikva, 49100<br>ISRAEL                          | Helsinki Committee, Rabin Medical Centre<br>Rabin Medical Centre Beilinson Campus<br>Petah-Tikva, 49100<br>ISRAEL               |
| 1077          | Dr. Sigal Fishman             |                           | Dr. Iris Dotan<br>Dr. Roman Grenshpon<br>Dr. Revital Kariv<br>Dr. Nitsan Maharshak<br>Dr. Jorge Pfeffer<br>Dr. Yulia Ron<br>Dr. Erez Scapa<br>Dr. Yami Shapira                                            | Department of Gastroenterology & Hepatology, Tel Aviv Sourasky Medical Center<br>6 Weizman St.<br>Tel Aviv, 64239<br>ISRAEL | Helsinki Committee<br>The Helsinki committee, Tel Aviv Sourasky Medical Center<br>6 Weizman Street<br>Tel Aviv, 64239<br>ISRAEL |
| 1080 *        | Prof. Abraham Eliakim         |                           | Dr. Irit Chermesh<br>Dr. Yehuda Chowers<br>Dr. Amir Klein<br>Dr. Itay Maza<br>Dr. Kamel Yassin                                                                                                            | Gastroenterology Insitute, Rambam Medical Center<br>PO Box 9602<br>Haifa, 31096<br>ISRAEL                                   | Rambam Medical Center Helsinki Committee<br>Rambam Medical Center<br>PO Box 9602<br>Haifa, 31096<br>ISRAEL                      |

\* Did not randomize subjects

## Italy

## Coordinating Investigators:

&lt;None Entered&gt;

| <u>Center</u> | <u>Principal Investigator</u>                      | <u>Co-Investigator(s)</u> | <u>Sub-Investigator(s)</u>                                                                   | <u>Address(es)</u>                                                                                                                                                                                                            | <u>Institutional Review Board or Ethics Committee Address(es)</u>                                                                                                                          |
|---------------|----------------------------------------------------|---------------------------|----------------------------------------------------------------------------------------------|-------------------------------------------------------------------------------------------------------------------------------------------------------------------------------------------------------------------------------|--------------------------------------------------------------------------------------------------------------------------------------------------------------------------------------------|
| 1004          | Prof. Paolo Gionchetti                             |                           | Dr. Ramona Brugnera<br>Prof. Fernando Rizzello<br>Dr. Giulia Straforini<br>Dr. Rosy Tambasco | Dipartimento di Medicina Clinica<br>SSD Malattie Infiammatorie<br>Croniche Intestinali<br>Azienda Ospedaliero<br>Universitaria di Bologna<br>Policlinico Sant'Orsola Malpighi<br>Via Massarenti, 9<br>Bologna, 40138<br>ITALY | Comitato Etico Indipendente<br>dell'Azienda Ospedaliero<br>Universitaria, Policlinico Sant'<br>Orsola Malpighi di Bologna,<br>Padiglione 3<br>Via Albertoni, 15<br>Bologna, 40138<br>ITALY |
| 1006 *        | Anna Kohn<br>Prof Cosimo Prantera<br>(Previous PI) |                           | Dr. Patrizia Meddi<br>Rita Monterubbianesi<br>Dr. Maria Lia Scribano<br>Dr. Antonio Tesi     | Azienda Ospedaliera Sanitaria<br>San Camillo Forlanini<br>U.O.C. di Gastroenterologia,<br>Padiglione Bassi, Il piano<br>Via Gianicolense, 87<br>Roma, 00152<br>ITALY                                                          | Comitato Etico dell'Azienda<br>Ospedaliera San Camillo Forlanini di<br>Roma<br>Circonvallazione Gianicolense, 87<br>Roma, 00152<br>ITALY                                                   |

090177e181c13ab2\Approved\Approved On: 07-Feb-2011 15:21

**Mexico****Coordinating Investigators:**

&lt;None Entered&gt;

| <b><u>Center</u></b> | <b><u>Principal Investigator</u></b> | <b><u>Co-Investigator(s)</u></b> | <b><u>Sub-Investigator(s)</u></b>                                                                                                        | <b><u>Address(es)</u></b>                                                                                                                                                             | <b><u>Institutional Review Board or Ethics Committee Address(es)</u></b>                                                                                                                              |
|----------------------|--------------------------------------|----------------------------------|------------------------------------------------------------------------------------------------------------------------------------------|---------------------------------------------------------------------------------------------------------------------------------------------------------------------------------------|-------------------------------------------------------------------------------------------------------------------------------------------------------------------------------------------------------|
| 1065                 | Jesus K Yamamoto-Furusho             |                                  | Dr. Enrique Coss-Adame<br>Claudia Herrera-de Guise                                                                                       | Instituto Nacional de Ciencias Medicas y Nutricion Salvador Zubiran<br>Departamento de Gastroenterologia 2do Piso Vasco de Quiroga 15 Col Seccion XVI Tlalpan, Mexico DF 14000 MEXICO | Instituto Nacional de Ciencias Medicas y Nutricion Salvador Zubiran<br>Comite Institucional de Investigacion Biomedica en Humanos VASCO DE QUIROGA 15 COL SECCION XVI TLALPAN Mexico, DF 14000 MEXICO |
| 1066                 | Pedro Lopez-Fournier                 |                                  | Dr. Reyna Manuela Bustamante-Gonzalez<br>Dr. Luis Kenji Carmona-Furusho<br>Dr. Norma Alicia Martinez-Trejo<br>Dr. Reyna Mendez-del-Monte | Clinicos Asociados BOCM, S.C Victor Hugo 191-BIS Altos Col Portales Delegacion Benito Juarez, Mexico DF 03300 MEXICO                                                                  | Comite Bioetico para la Investigacion Clinica S.C. Puebla 422 Despacho 4 Col. Roma Sur MEXICO, DISTRITO FEDERAL 06700 MEXICO                                                                          |

090177e181c13ab2\Approved\Approved On: 07-Feb-2011 15:21

## Netherlands

## Coordinating Investigators:

&lt;None Entered&gt;

| <u>Center</u> | <u>Principal Investigator</u>                | <u>Co-Investigator(s)</u> | <u>Sub-Investigator(s)</u>              | <u>Address(es)</u>                                                              | <u>Institutional Review Board or Ethics Committee Address(es)</u>                          |
|---------------|----------------------------------------------|---------------------------|-----------------------------------------|---------------------------------------------------------------------------------|--------------------------------------------------------------------------------------------|
| 1018          | Dr. Ad A. van Bodegraven gastro-enterologist |                           | Dr. G. Bouma<br>Dr. D. P. van Asseldonk | VU Medisch Centrum<br>De Boelelaan 1118<br>Amsterdam, NH 1081 HV<br>NETHERLANDS | METC VU Medisch Centrum<br>PK 6 Z 202<br>Postbus 7075<br>Amsterdam, 1007 MB<br>NETHERLANDS |

090177e181c13ab2\Approved\Approved On: 07-Feb-2011 15:21

**Poland****Coordinating Investigators:**

&lt;None Entered&gt;

| <u>Center</u> | <u>Principal Investigator</u> | <u>Co-Investigator(s)</u> | <u>Sub-Investigator(s)</u>                                                                   | <u>Address(es)</u>                                                                                                                                                                                                 | <u>Institutional Review Board or Ethics Committee Address(es)</u>                              |
|---------------|-------------------------------|---------------------------|----------------------------------------------------------------------------------------------|--------------------------------------------------------------------------------------------------------------------------------------------------------------------------------------------------------------------|------------------------------------------------------------------------------------------------|
| 1010          | Prof. Leszek Paradowski       |                           | Dr. Jadwiga Lapinska<br>Dr. Barbara Wozniak-Stolarska                                        | Klinika Gastroenterologii i Hepatologii<br>Akademicki Szpital Kliniczny im. Jana Mikulicza-Radeckiego we Wroclawiu<br>ul. Borowska 213<br>Wroclaw, 50-556<br>POLAND                                                | Komisja Bioetyki Uniwersytetu Medycznego w Lodzi<br>Al. Kosciuszki 4<br>Lodz, 90-419<br>POLAND |
| 1013          | Prof. Ewa Malecka-Panas       |                           | Dr. Anita Gasiorowska<br>Dr. Justyna Kotynia<br>Dr. Renata Talar-Wojnarowska                 | Oddzial Kliniczny Gastroenterologii Ogolnej i Onkologicznej<br>SPZOZ Uniwersytecki Szpital Kliniczny nr 1 im. Norberta Barlickiego Uniwersytetu Medycznego w Lodzi<br>ul.Kopcinskiego 22<br>Lodz, 90-153<br>POLAND | Komisja Bioetyki Uniwersytetu Medycznego w Lodzi<br>Al. Kosciuszki 4<br>Lodz, 90-419<br>POLAND |
| 1049          | Prof. Maciej Swiatkowski      |                           | Dr. Malgorzata Brymora<br>Dr. Maria Klopocka<br>Dr. Marcin Manerowski<br>Dr. Agnieszka Meder | Oddzial Kliniczny Gastroenterologii, Angiologii i Chorob Wewnetrznych<br>Szpital Uniwersytecki nr 2 im. Dr Jana Bizuela w Bydgoszczy<br>ul. Ujejskiego 75<br>Bydgoszcz, 85-168<br>POLAND                           | Komisja Bioetyki Uniwersytetu Medycznego w Lodzi<br>Al. Kosciuszki 4<br>Lodz, 90-419<br>POLAND |

## Slovakia

## Coordinating Investigators:

&lt;None Entered&gt;

| <u>Center</u> | <u>Principal Investigator</u> | <u>Co-Investigator(s)</u> | <u>Sub-Investigator(s)</u> | <u>Address(es)</u>                                                                                                  | <u>Institutional Review Board or Ethics Committee Address(es)</u>                                                                                                                                                                                                                           |
|---------------|-------------------------------|---------------------------|----------------------------|---------------------------------------------------------------------------------------------------------------------|---------------------------------------------------------------------------------------------------------------------------------------------------------------------------------------------------------------------------------------------------------------------------------------------|
| 1043          | Dr. Ladislav Kuzela           |                           | Dr. Peter Paulen           | Lama Medical Care s.r.o<br>Gastroentero-hepatologicke centrum Thalion<br>Mytna 5<br>Bratislava, 811 07<br>SLOVAKIA  | Eticka komisia<br>Univerzitna nemocnica Bratislava<br>Limbova 5<br>Bratislava, SLOVAKIA 833 05<br>SLOVAKIA<br><br>Eticka komisia Bratislavskeho samospravného kraja<br>Eticka komisia Bratislavskeho samospravného kraja<br>Sabinovska 16<br>P.O. Box 106<br>Bratislava, 820 05<br>SLOVAKIA |
| 1044          | Dr. Boris Baricky             |                           |                            | Medicinske centrum Nitra spol. s r.o.<br>Gastroenterologicka ambulancia<br>Fatranska 12<br>Nitra, 94901<br>SLOVAKIA | Eticka komisia<br>Univerzitna nemocnica Bratislava<br>Limbova 5<br>Bratislava, SLOVAKIA 833 05<br>SLOVAKIA<br><br>Eticka komisia Nitrianskeho samospravného kraja<br>Stefanikova tr. 69<br>Nitra, 949 01<br>SLOVAKIA                                                                        |



| <u>Center</u> | <u>Principal Investigator</u> | <u>Co-Investigator(s)</u> | <u>Sub-Investigator(s)</u> | <u>Address(es)</u>                                                                                                                                                  | <u>Institutional Review Board or Ethics Committee Address(es)</u>                                                                                                                                                      |
|---------------|-------------------------------|---------------------------|----------------------------|---------------------------------------------------------------------------------------------------------------------------------------------------------------------|------------------------------------------------------------------------------------------------------------------------------------------------------------------------------------------------------------------------|
| 1079          | Tibor Hlavaty                 |                           | Tomas Koller<br>Jozef Toth | Gastroenterologicke a<br>hepatologicke oddelenie, V.<br>interna klinika LFUK a UN<br>Bratislava, Ruzinov<br>Ruzinovska 6<br>Bratislava, SLOVAKIA 826 06<br>SLOVAKIA | Eticka komisia<br>Univerzitna nemocnica Bratislava<br>Limbova 5<br>Bratislava, SLOVAKIA 833 05<br>SLOVAKIA<br><br>Eticka komisia<br>Univerzitna nemocnica Bratislava<br>Ruzinovska 6<br>Bratislava, 826 06<br>SLOVAKIA |

090177e181c13ab2\Approved\Approved On: 07-Feb-2011 15:21

## South Africa

### Coordinating Investigators:

<None Entered>

| <u>Center</u> | <u>Principal Investigator</u> | <u>Co-Investigator(s)</u> | <u>Sub-Investigator(s)</u>       | <u>Address(es)</u>                                                                                                | <u>Institutional Review Board or Ethics Committee Address(es)</u>                                                                                                                  |
|---------------|-------------------------------|---------------------------|----------------------------------|-------------------------------------------------------------------------------------------------------------------|------------------------------------------------------------------------------------------------------------------------------------------------------------------------------------|
| 1047          | Dr John P. Wright             |                           | Dr. Abdul Karriem Cariem         | Kingsbury Hospital<br>301 Fairfields Suite<br>Wildernis Road<br>Claremont, Western Cape 7708<br>SOUTH AFRICA      | South African Medical Association<br>Research Ethics Committee<br>Block F, Castle Walk, Corporate<br>Park<br>Nossob Street<br>Erasmuskloof Ext 3<br>Pretoria, 0153<br>SOUTH AFRICA |
| 1048          | Dr Frederik Cornelius Kruger  |                           | Dr Jane Elizabeth Christie Botha | Durbanville Medi-clinic<br>Room 106<br>Wellington Str<br>Durbanville, Western Cape 7550<br>SOUTH AFRICA           | South African Medical Association<br>Research Ethics Committee<br>Block E Castle Walk Corporate Park<br>Nossob Street Erasmuskloof Ext 3<br>Pretoria, 0153<br>SOUTH AFRICA         |
| 1050 *        | Herbert R. Schneider          |                           | Dr. Brendan Dirk Bebington       | Milpark Clinic<br>Room 202 Second Floor<br>9 Guild Road<br>Parktown<br>Johannesburg, Gauteng 2193<br>SOUTH AFRICA | South African Medical Association<br>Research Ethics Committee<br>Block E Castle Walk Corporate Park<br>Nossob Street Erasmuskloof Ext 3<br>Pretoria, 0153<br>SOUTH AFRICA         |

| <u>Center</u> | <u>Principal Investigator</u> | <u>Co-Investigator(s)</u> | <u>Sub-Investigator(s)</u>                                                               | <u>Address(es)</u>                                                                                                                                                                                                             | <u>Institutional Review Board or Ethics Committee Address(es)</u>                                                                                                                  |
|---------------|-------------------------------|---------------------------|------------------------------------------------------------------------------------------|--------------------------------------------------------------------------------------------------------------------------------------------------------------------------------------------------------------------------------|------------------------------------------------------------------------------------------------------------------------------------------------------------------------------------|
| 1062 *        | Dr. Suleman Abdul Moola       |                           | Ismail Aboobaker<br>Abdullah<br>Dr Sarah Mohammed Moola<br>Dr Anoob Ramdayal<br>Seebaran | St Augustine Medical Centre 2<br>107 Chelsmford Road<br>Berea<br>Durban, Kwa-Zulu Natal 4001<br>SOUTH AFRICA<br><br>St Augustine Medical Centre 2<br>107 JB Marks Road<br>Berea<br>Durban, Kwa-Zulu Natal 4001<br>SOUTH AFRICA | South African Medical Association<br>Research Ethics Committee<br>Block F, Castle Walk, Corporate<br>Park<br>Nossob Street<br>Erasmuskloof Ext 3<br>Pretoria, 0153<br>SOUTH AFRICA |
| 1069          | Dr. Nazimuddin Aboo           |                           | Dr. Harshadkumar<br>Ishwarial Rajput                                                     | Parklands Medical Centre<br>Suite 1A<br>75 Hopelands Road<br>Overport, Durban 4091<br>SOUTH AFRICA                                                                                                                             | South African Medical Association<br>Research Ethics Committee<br>Block E Castle Walk Corporate Park<br>Nossob Street Erasmuskloof Ext 3<br>Pretoria, 0153<br>SOUTH AFRICA         |

090177e181c13ab2\Approved\Approved On: 07-Feb-2011 15:21

## Spain

## Coordinating Investigators:

&lt;None Entered&gt;

| <u>Center</u> | <u>Principal Investigator</u> | <u>Co-Investigator(s)</u> | <u>Sub-Investigator(s)</u>                                                                                                                                                        | <u>Address(es)</u>                                                                                                                                  | <u>Institutional Review Board or Ethics Committee Address(es)</u>                                                                                           |
|---------------|-------------------------------|---------------------------|-----------------------------------------------------------------------------------------------------------------------------------------------------------------------------------|-----------------------------------------------------------------------------------------------------------------------------------------------------|-------------------------------------------------------------------------------------------------------------------------------------------------------------|
| 1020          | Maria Isabel Vera<br>Mendoza  |                           | Juan De la Revilla<br>Virginia Matallana Royo<br>Maria Belen Ruiz<br>Antoran<br>Arantxa Sancho Lopez                                                                              | HOSPITAL UNIVERSITARIO<br>PUERTA DE HIERRO<br>MAJADAHONDA<br>SERVICIO DE DIGESTIVO<br>C/ MANUEL DE FALLA 1<br>MAJADAHONDA, MADRID<br>28222<br>SPAIN | Hospital Clinico San Carlos<br>ETHICS COMMITTEE OF<br>CLINICAL INVESTIGATION<br>AREA 7<br>C/ PROFESOR MARTIN LAGOS,<br>S/N<br>MADRID, MADRID 28040<br>SPAIN |
| 1021          | Julian Panes Diaz             |                           | Montserrat Aceituno<br>Orlando Garcia Bosch<br>Ingrid Ordas Jimenez<br>ELENA RICART<br>Miguel Sans Cuffi                                                                          | HOSPITAL CLINIC I<br>PROVINCIAL DE<br>BARCELONA<br>SERVICIO DE DIGESTIVO<br>C/ VILLARROEL 170<br>BARCELONA, BARCELONA<br>08036<br>SPAIN             | Hospital Clinico San Carlos<br>ETHICS COMMITTEE OF<br>CLINICAL INVESTIGATION<br>AREA 7<br>C/ PROFESOR MARTIN LAGOS,<br>S/N<br>MADRID, MADRID 28040<br>SPAIN |
| 1022          | Jordi Guardiola               |                           | Ana Berrozpe Lopez<br>Josep Maria Botargues<br>Marcela Manriquez<br>Mireia Peñalva Peñas<br>Francisco Rodriguez<br>CLARA MARIA ROSSO<br>FERNANDEZ<br>Antonio Soriano<br>Izquierdo | HOSPITAL UNIVERSITARI<br>DE BELLVITGE<br>SERVICIO DE DIGESTIVO<br>C/ FEIXA LLARGA, S/N<br>L'HOSPITALET DE<br>LLOBREGAT, BARCELONA<br>08907<br>SPAIN | Hospital Clinico San Carlos<br>ETHICS COMMITTEE OF<br>CLINICAL INVESTIGATION<br>AREA 7<br>C/ PROFESOR MARTIN LAGOS,<br>S/N<br>MADRID, MADRID 28040<br>SPAIN |

090177e181c13ab2\Approved\Approved On: 07-Feb-2011 15:21

## Sweden

## Coordinating Investigators:

&lt;None Entered&gt;

| <u>Center</u> | <u>Principal Investigator</u> | <u>Co-Investigator(s)</u> | <u>Sub-Investigator(s)</u>                  | <u>Address(es)</u>                                                          | <u>Institutional Review Board or Ethics Committee Address(es)</u>                                               |
|---------------|-------------------------------|---------------------------|---------------------------------------------|-----------------------------------------------------------------------------|-----------------------------------------------------------------------------------------------------------------|
| 1067          | Dr. Ake Danielsson            |                           | Pontus Karling<br>Olé Suhr<br>Marten Werner | Norrlands Universitetssjukhus,<br>Medicinkliniken<br>Umea, 901 85<br>SWEDEN | Regionala etikprovningssamfundet i<br>Umea<br>Samverkanshuset,<br>Universitetsområdet<br>Umea, 901 87<br>SWEDEN |
| 1070          | Kjell-Ake Jonsson             |                           | Henrik Simán<br>Adam Witek                  | Centrallasarettet Vaxjo,<br>Medicinska kliniken<br>Vaxjo, 351 85<br>SWEDEN  | Regionala etikprovningssamfundet i<br>Umea<br>Samverkanshuset,<br>Universitetsområdet<br>Umea, 901 87<br>SWEDEN |

090177e181c13ab2\Approved\Approved On: 07-Feb-2011 15:21

## United Kingdom

## Coordinating Investigators:

&lt;None Entered&gt;

| <u>Center</u> | <u>Principal Investigator</u> | <u>Co-Investigator(s)</u> | <u>Sub-Investigator(s)</u>                          | <u>Address(es)</u>                                                                                                                                                                                                                    | <u>Institutional Review Board or Ethics Committee Address(es)</u>                                                                                                                                                                                                                                                              |
|---------------|-------------------------------|---------------------------|-----------------------------------------------------|---------------------------------------------------------------------------------------------------------------------------------------------------------------------------------------------------------------------------------------|--------------------------------------------------------------------------------------------------------------------------------------------------------------------------------------------------------------------------------------------------------------------------------------------------------------------------------|
| 1009 *        | Prof. Christopher Probert     |                           | Dr. Tom Julian Creed<br>Dr. John Edmund<br>Smithson | Department of Gastroenterology<br>Bristol Royal Infirmary<br>Marlborough Street<br>Bristol, BS2 8HW<br>UNITED KINGDOM                                                                                                                 | Oxfordshire REC C<br>National Research Ethics Service<br>Ted Co Business Centre<br>Unit 002<br>Rolling Mill Road<br>Jarrow, Tyneside NE32 3DT<br>UNITED KINGDOM<br><br>Oxfordshire Research Ethics<br>Committee C<br>2nd Floor, Astral House<br>Chaucer Business Park<br>Granville Way<br>Bicester, OX26 4JT<br>UNITED KINGDOM |
| 1040          | Allan John Morris             |                           | Dr Daniel R. Gaya<br>Dr Jack Westwood<br>Winter     | Clinical Research Facility<br>Tennent Institute<br>38 Church Street<br>Western Infirmary<br>Glasgow, G11 6NT<br>UNITED KINGDOM<br><br>Ward 8/9<br>Glasgow Royal Infirmary<br>82/84 Castle Street<br>Glasgow, G4 0SS<br>UNITED KINGDOM | Oxfordshire REC C<br>National Research Ethics Service<br>2nd Floor, Astral House<br>Chaucer Business Park, Granville<br>Way<br>Bicester, OX26 4JT<br>UNITED KINGDOM<br><br>Ted Co Business Centre<br>Unit 002<br>Rolling Mill Road<br>Jarrow<br>Tyneside, NE32 3DT<br>UNITED KINGDOM                                           |

\* Did not randomize subjects

| <u>Center</u> | <u>Principal Investigator</u> | <u>Co-Investigator(s)</u> | <u>Sub-Investigator(s)</u>                                        | <u>Address(es)</u>                                                                                                                                     | <u>Institutional Review Board or Ethics Committee Address(es)</u>                                                                                                                                                                                                                                                                          |
|---------------|-------------------------------|---------------------------|-------------------------------------------------------------------|--------------------------------------------------------------------------------------------------------------------------------------------------------|--------------------------------------------------------------------------------------------------------------------------------------------------------------------------------------------------------------------------------------------------------------------------------------------------------------------------------------------|
| 1051          | Dr. Simon Scott<br>Campbell   |                           | Dr. Alistair Makin<br>Dr. Satheesh Nair<br>Dr Robert Paul Willert | Central Manchester University<br>Hospitals Foundation Trust,<br>Department of Gastroenterology<br>Oxford Road<br>Manchester, M13 9WL<br>UNITED KINGDOM | Oxfordshire REC C<br>National Research Ethics Service<br>2nd Floor, Astral House<br>Chaucer Business Park, Granville<br>Way<br>Bicester, OX26 4JT<br>UNITED KINGDOM<br><br>Oxfordshire REC C<br>National Research Ethics Service<br>Ted Co Business Centre<br>Unit 002<br>Rolling Mill Road<br>Jarrow, Tyneside NE32 3DT<br>UNITED KINGDOM |

090177e181c13ab2\Approved\Approved On: 07-Feb-2011 15:21
