# Supplementary material for: Randomized trial of tofacitinib in active ulcerative colitis: analysis of efficacy based on patient-reported outcomes
Source: PubMed Central journal article supplement (PMC4323227; doi:10.1186/s12876-015-0239-9), 2015-02-05

a

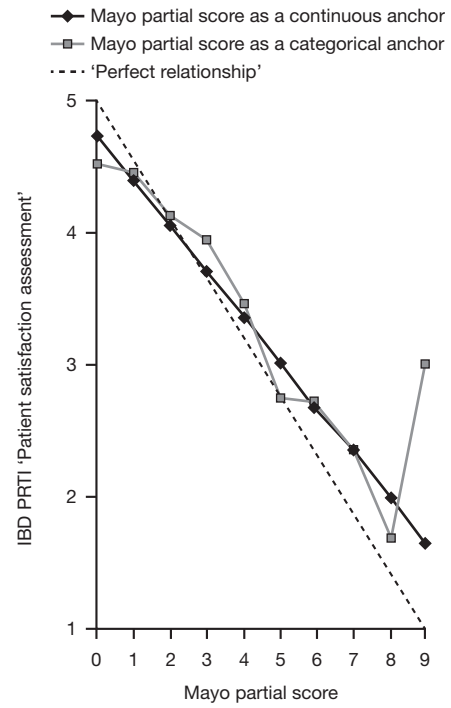

b

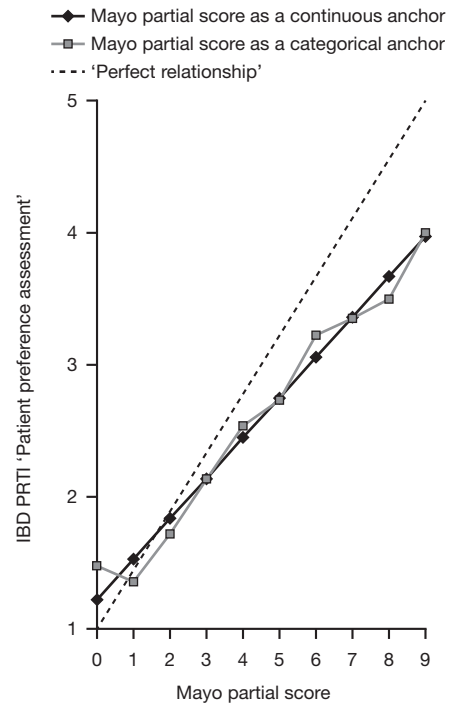

c

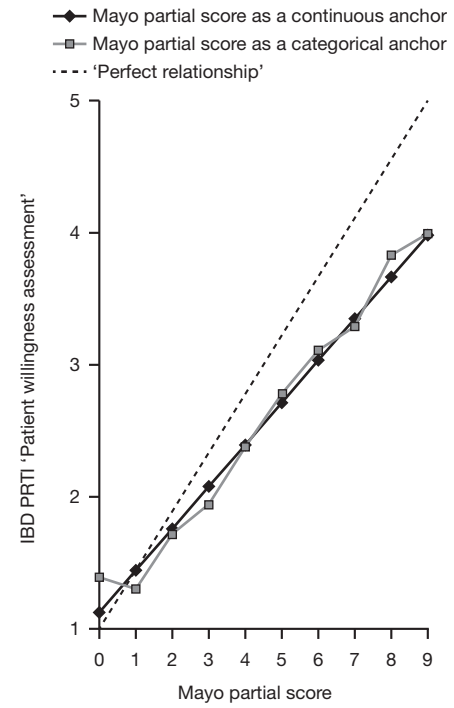

Supplement: 12876_2015_239_MOESM5_ESM.pdf [file 12876_2015_239_MOESM5_ESM.pdf]
