# Supplementary material for: Randomized trial of tofacitinib in active ulcerative colitis: analysis of efficacy based on patient-reported outcomes
Source: Springer Nature journal article supplement (doi:10.1186/s12876-015-0239-9), 2015-02-04

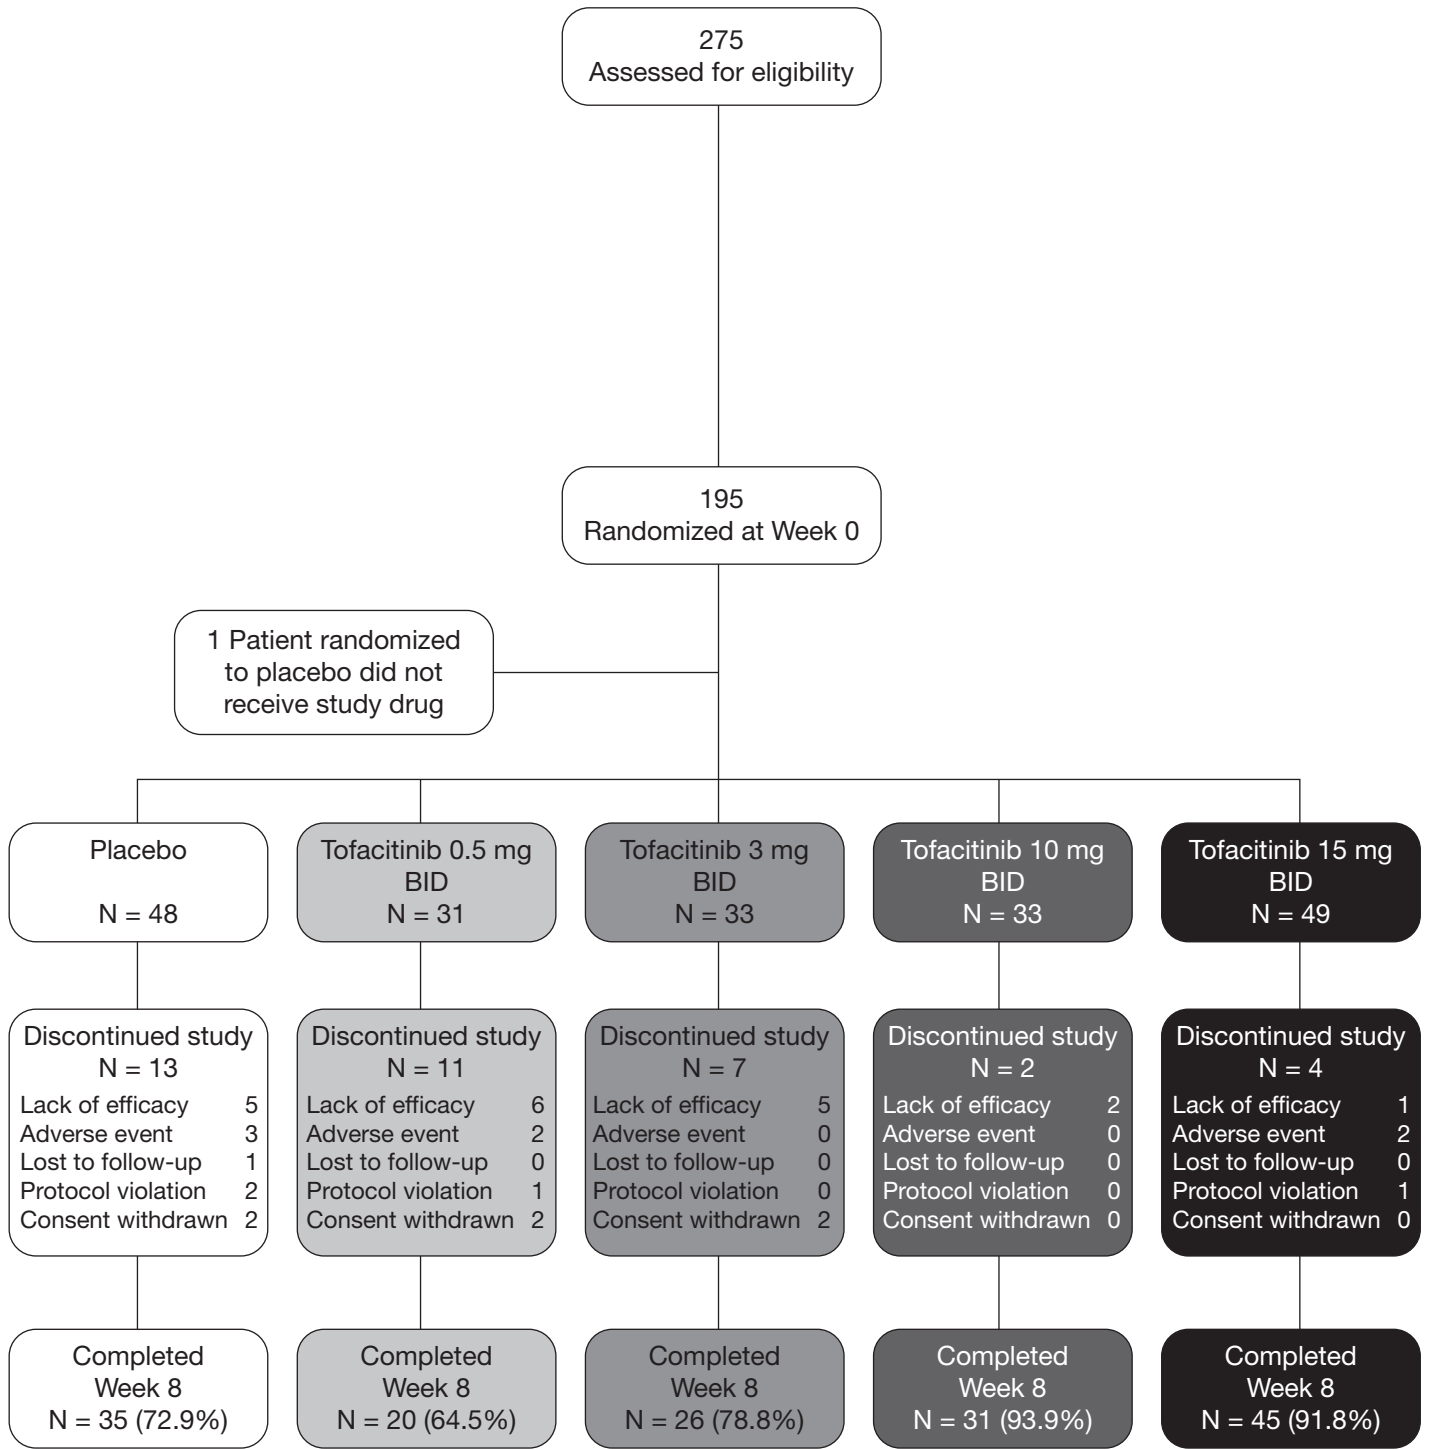

Supplement: MOESM4 [file 9738110]
